1 **Widespread shorter cortical adaptation in dyslexia**

2

3 Sagi Jaffe-Dax<sup>1\*</sup>, Eva Kimel<sup>2</sup> and Merav Ahissar<sup>2,3</sup>

4

5 <sup>1</sup>Department of Psychology, Princeton University

6 <sup>2</sup>The Edmond and Lily Safra Center for Brain Sciences, Hebrew University of Jerusalem

7 <sup>3</sup>Department of Psychology, Hebrew University of Jerusalem

8 \* jaffedax@princeton.edu

9

## 10 **Abstract**

11 Studies of dyslexics' performance on perceptual tasks suggest that their implicit inference of  
12 sound statistics is impaired. In a previous paper (Jaffe-Dax, Frenkel, & Ahissar, 2017), using 2-  
13 tone frequency discrimination, we found that the effect of previous trial frequencies on dyslexics'  
14 judgments decayed faster than the effect on controls' judgments, and that the adaptation of their  
15 ERP responses to tones recovered faster. Here, we show the cortical distribution of this  
16 abnormal dynamics of adaptation using fast acquisition fMRI. We find that dyslexics' faster  
17 decay of adaptation is widespread, though the most significant effects are found in the left  
18 superior temporal lobe, including the auditory cortex. This broad distribution suggests that  
19 dyslexics' faster decay of implicit memory is a general characteristic of their cortical dynamics,  
20 which also encompasses the sensory cortices.

21 **Keywords:** adaptation; fMRI; dyslexia; Anchoring Deficit Hypothesis of dyslexia; statistical  
22 learning.

## 23 **Introduction**

24 Dyslexia, a specific and significant impairment in the development of reading skills that is not  
25 accounted for by mental age, visual acuity problems, or inadequate schooling (WHO, 2010),  
26 affects ~5% of the world's population (Lindgren, De Renzi, & Richman, 1985). Though dyslexics  
27 are diagnosed for their reading impairments, they also often have difficulties on simple non-  
28 linguistic perceptual tasks (Ahissar, Protopapas, Reid, & Merzenich, 2000; Giraud & Ramus,  
29 2013; McAnally & Stein, 1996; Sperling, Lu, Manis, & Seidenberg, 2005). These can be largely  
30 explained as resulting from inefficient use of stimulus statistics in the experiment (the "Anchoring  
31 Deficit hypothesis"; Ahissar, Lubin, Putter-Katz, & Banai, 2006; Oganian & Ahissar, 2012, Jaffe-  
32 Dax et al., 2015). In these tasks, participants are not aware of the effect of previous stimuli, but  
33 their perception tends to contract to their estimated mean of these stimuli (contraction bias; Raviv,  
34 Ahissar, & Loewenstein, 2012; Raviv, Lieder, Loewenstein, & Ahissar, 2014).

35 The neural mechanism that may underlie the implicit learning of experimental statistics is  
36 adaptation; i.e., an automatic, implicit, and stimulus-specific decrease of the response to repeated  
37 stimuli. Importantly, the rate of decay of the behavioral effect of previous trials in serial  
38 discrimination is similar to the rate of decay of neural adaptation, as measured by MEG (Lu,  
39 Williamson, & Kaufman, 1992). Inspired by this finding, we recently compared both behavioral  
40 dynamics and rate of adaptation (ERP responses) of good readers (i.e., the control group) and  
41 dyslexics (Jaffe-Dax, Frenkel, & Ahissar, 2017). The participants performed serial discrimination  
42 in four blocks of trials with different Trial Onset Asynchronies (TOAs). Both the magnitude of  
43 perceptual contraction to the mean frequency of previous trials and the magnitude of neural  
44 adaptation (P2 and N1 components that are automatically produced by the auditory cortex,  
45 Mayhew, Dirckx, Niazy, Iannetti, & Wise, 2010) decayed faster in dyslexics (ERP; Jaffe-Dax et  
46 al., 2017).

47 Since ERP responses cannot be used to localize the cortical source of this group difference, we  
48 then recruited the participants from the ERP study (Jaffe-Dax et al., 2017) to take part in an fMRI  
49 study with a similar protocol, which allowed us to characterize which brain areas show shorter  
50 adaptation in dyslexics. Using the ERP based protocol in the scanner, we measured the BOLD

51 response ( $\beta$ s) to tones for each TOA, and calculated the time constant of adaptation (fitting an  
52 exponential decay function) in the responding voxels and in the (pre-defined) auditory cortex. All  
53 cortical regions that responded to tone discrimination showed a tendency to decay faster in  
54 dyslexics. Significant differences were found in the primary auditory cortex, broader regions of  
55 the left superior temporal lobe, and in the right insular cortex.

## 56 **Results**

57 We recruited 20 dyslexics and 19 good readers from our previous study (Jaffe-Dax et al., 2017)  
58 and asked them to perform 2-tone frequency discrimination in separate blocks with four trial-onset  
59 intervals (TOAs) of 3, 6, 9, and 15 seconds, respectively. Before entering the scanner, all  
60 participants performed a short 4-block training session, in which the two groups exhibited similar  
61 accuracy ( $72.4 \pm 6\%$  vs.  $73 \pm 4.6\%$ ,  $z = 0.5$ ,  $p = 0.57$ ). In-scan, good readers (controls) performed  
62 better ( $82.5 \pm 1.6\%$  vs.  $76.3 \pm 2.2\%$ ,  $z = 2.6$ ,  $p < 0.01$ . Mean  $\pm$  SEM. Mann-Whitney U-tests),  
63 suggesting that they gained more from the short pre-scan practice (in line with the faster learning  
64 reported in Jaffe-Dax et al., 2017).

65 To evaluate the dynamics of cortical adaptation in each group, we used the following procedure.  
66 First, we determined which Talairach voxels responded to the task (standard GLM,  $p < 0.001$ ,  
67 FDR corrected) when all participants were considered. For each of these voxels, we calculated  
68 the dynamics of adaptation, among controls and among dyslexics, as follows. We estimated  $\beta$   
69 over the mean BOLD response of each group in each of the four TOA conditions. Using these  
70  $\beta$ s, we fitted an exponential decay model (Jaffe-Dax et al., 2017):  $\beta(TOA) = a + b \exp(-TOA/\tau)$   
71 to each voxel. In this model  $\tau$  denotes the time scale of adaptation,  $a$  is the asymptote level of  
72 BOLD and  $b$  is the amplitude of adaptation. Figures 1A-B plot the distribution of the fitted  $\tau$ s for  
73 controls and dyslexics, respectively. It illustrates the broadly distributed trend of faster decay in  
74 the dyslexic group.

75 To locate regions in which the fitted  $\tau$  differed significantly between the groups, we conducted  
76 a whole brain analysis, in which we fitted  $\tau$  to each voxel, and for each participant separately. To  
77 reduce the impact of outliers resulting from the noisy estimation of  $\tau$  (due to this single subject &  
78 single voxel analysis) we assessed group difference with a non-parametric test (Mann-Whitney U  
79 test), in which extreme values are not over-weighted. We corrected for multiple comparison bias  
80 by requiring a cluster of contingent voxels with a significant group difference ( $p < 0.05$ , cluster  
81 corrected to 44 spatially contingent voxels, based on Monte-Carlo cluster level correction).  
82 Significant regions were found in the left superior temporal cortex (TAL: -54, -18, 10) and in the  
83 right insular cortex (TAL: 39, -2, -8), outlined in purple in Figures 1A-B. The superior temporal  
84 cortex is known to be involved in a broad range of auditory tasks, including simple tone  
85 discrimination (Daikhin & Ahissar, 2015), language (Fedorenko, Hsieh, Nieto-Castañón, Whitfield-  
86 Gabrieli, & Kanwisher, 2010), music (Fedorenko, Behr, & Kanwisher, 2011), and even social tasks  
87 (e.g. Deen, Koldewyn, Kanwisher, & Saxe, 2015). Thus, this group difference for this area was  
88 expected given the behavioral results. The right insular cortex is multi-modal (Bushara et al.,  
89 2003), and is also involved in introspection (Craig, Chen, Bandy, & Reiman, 2000). Comparing  
90 Figures 1A and 1B suggests that other regions might have a larger mean group differences (e.g.,  
91 frontal cortices), but due to large inter-subject variability in these regions, the group differences

92 were not significant. This large variability might account for the spurious dots of large  $\tau$  values  
93 scattered throughout the cortical map (Figure 1 A-B).

94

95

**A. Control group distribution of time constants ( $\tau$ ) of adaptation [sec]**

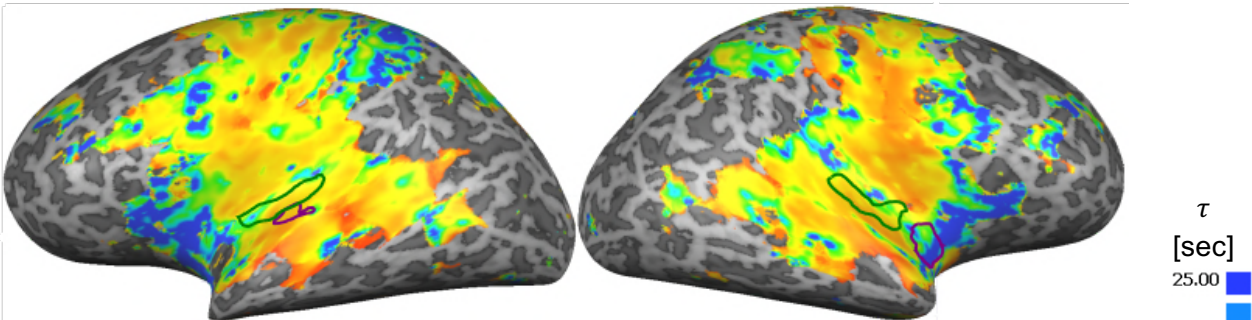

**B. Dyslexic group distribution of time constants ( $\tau$ ) of adaptation [sec]**

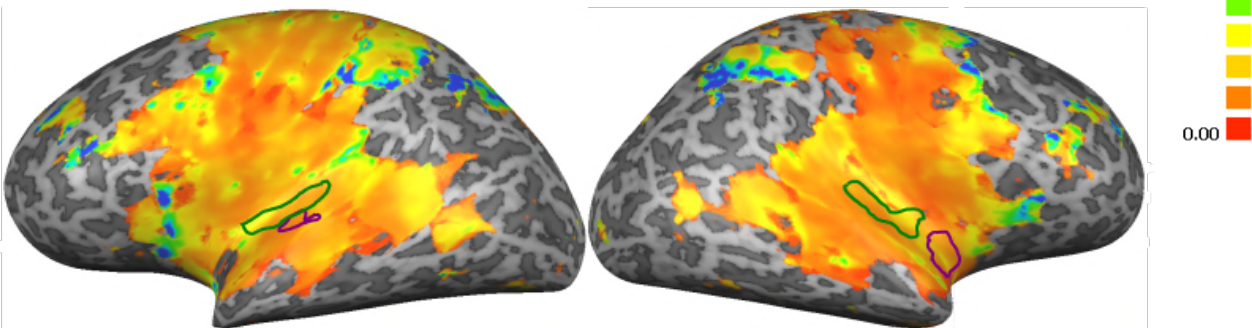

**Figure 1.** Cortical distribution of the estimated time constants ( $\tau$ ) of adaptation, calculated separately for each of the responding voxels, based on the mean BOLD response. **A.** Controls. **B.** Dyslexics. Dyslexics' estimated  $\tau$ s were consistently shorter. Significant group differences (Monte-Carlo cluster-level corrected: cluster threshold of 44 voxels) are outlined in purple. Green outlines denote primary auditory cortex ROI.

96

97 The whole brain analysis allocated high level areas in the left superior temporal lobe and the  
98 right insular cortex. However, it did not allocate a consistent cluster of significant group-difference  
99 voxels in the primary auditory cortex (Zatorre, Belin, & Penhune, 2002). To test whether the  
100 primary auditory cortex would show a similar group difference when its BOLD response was  
101 averaged across voxels, we delineated a ROI in each hemisphere, based on a combined  
102 cytoarchitectonic (Morosan et al., 2001) and myeloarchitectonic (Dick et al., 2012) definition (we  
103 included the three sub-regions of the primary auditory cortex: Te1.1, Te1.0 and Te1.2). We fitted  
104 the exponential decay model to the  $\beta$ s averaged over the right and the left auditory cortices  
105 (composed of 99 voxels each, denoted by the green outlines in Figures 1A-B). We found

106 significant differences between the groups'  $\tau$ s in the left auditory cortex ( $z = 2.6$ ,  $p < 0.01$ , effect  
107 size  $r = 0.42$ ). In the right primary auditory cortex, the difference between controls' and dyslexics'  
108  $\tau$  showed the same trend, but did not reach significance ( $z = 1.5$ ,  $p = 0.15$ , effect size  $r = 0.23$ .  
109 Mann-Whitney U-tests). Figure 2 shows the  $\beta$ s estimated for the left and right primary auditory  
110 cortices of the controls (blue) and dyslexics (red) on each of the four TOA blocks.

111

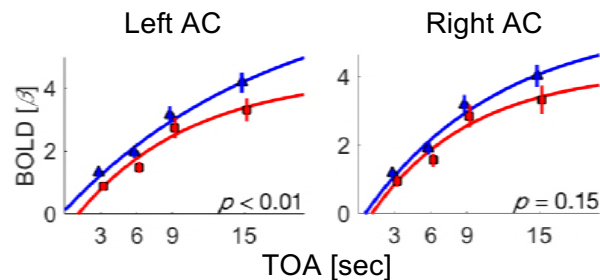

**Figure 2.** BOLD response as a function of TOA in the primary auditory cortex of each hemisphere. Blue – control. Red – dyslexic. AC – auditory cortex.

112

113 Taken together, the whole brain and ROI analyses revealed a significant group difference in the  
114 time scales of adaptation in the left superior temporal cortex, the primary auditory cortex, and the  
115 right insular cortex. Nevertheless, the general trend of dyslexics' shorter adaptation was  
116 consistent across all responding voxels.

## 117 Discussion

118 We characterized the cortical distribution of dyslexics' and controls' decay of BOLD adaptation,  
119 thus extending our previous behavioral and ERP study (Jaffe-Dax et al., 2017). We found a  
120 broadly distributed tendency for shorter adaptation in dyslexia. We further assessed group  
121 difference in the left and right primary auditory cortices, for which previous reports are mixed. For  
122 example, Clark et al. reported early anatomical abnormalities (Clark et al., 2014), whereas Boets  
123 et al. (2013) reported adequate stimulus resolution. We found a significant group difference in the  
124 left primary auditory cortex, and a similar tendency, which did not reach significance, in the right  
125 primary auditory cortex.

126 The broad distribution of abnormally short adaptation in dyslexia is in line with recent  
127 observations of a domain general abnormally small adaptation in dyslexia (Perrachione et al.,  
128 2016). Perrachione et al. compared BOLD responses to stimulus repetitions with responses to  
129 different auditory and visual stimuli, and found reduced stimulus-specific adaptation in high-level  
130 the auditory (superior temporal), visual (fusiform and LO), and associative (insular and inferior  
131 frontal) cortices. Their repeated (and non-repeated) stimuli were presented over a similar  
132 temporal window as in the current study. Therefore, dyslexics' abnormally small adaptation may  
133 stem from its shorter duration; in other words, dyslexics' accumulative adaptation across a time  
134 window of ~10 seconds was smaller than controls' because it largely recovered. In line with the

135 observation of dyslexics' domain general reduced adaptation, a reduced effect of previous trials  
136 was also found behaviorally in the visual modality when performance was measured with serial  
137 visual (spatial frequency) discrimination (Jaffe-Dax, Lieder, Biron, & Ahissar, 2016). Together,  
138 these studies are consistent with the interpretation that dyslexics' sensory processing is adequate,  
139 but their cortical neural adaptation is abnormally short, yielding shorter implicit memory traces.

## 140 **Methods**

141 In the 2-tone frequency discrimination task, subjects were asked to indicate which of two  
142 sequentially presented tones had a higher pitch. The tones were 50ms long, presented at  
143 comfortable intensity, and were drawn from a uniform distribution between 800-1250 Hz. The  
144 frequency difference within each pair was randomly drawn between 1-20% (following the protocol  
145 in Jaffe-Dax et al., 2017). In the pre-training session (8 minutes) each participant performed 16  
146 trials of each of the 4 Trial Onset Asynchronies (TOAs) of 3, 6, 9, or 15 seconds, administered in  
147 4 separate blocks in random order. These TOAs are longer than those in our previous ERP  
148 experiment (1.5, 3, 6, and 9 seconds, Jaffe-Dax et al., 2017), since the controls' ERP (N1 and P2)  
149 response at 9 seconds was still larger than at 6 seconds. In the scanner, each participant  
150 performed 3 runs of 4 blocks of 16 trials (48 trials in each TOA). Each block had a constant TOA  
151 of either 3, 6, 9, or 15 seconds. This number of trials was sufficient for estimating  $\tau$  based on the  
152 magnitude of the BOLD response. However, it was too small for robust estimation of behavioral  
153 context effects, which are based on the difference in success rate (binary scores for each trial)  
154 between trials that gain and those that are hampered by the context (Jaffe-Dax et al., 2017).  
155 Stimuli were digitally constructed using Matlab 2015b (The Mathworks Inc., Natwick, MA) and  
156 administered through inserted sound attenuating MR compatible S14 earphones (Sensimetrics  
157 Corporation, Malden, MA). The demographic, cognitive and reading assessments of this cohort  
158 are described in Jaffe-Dax et al., 2017.

159 Before the functional scan, high-resolution ( $1 \times 1 \times 1$  mm resolution) T1-weighted  
160 magnetization-prepared rapid acquisition gradient-echo (MPRAGE) images were acquired using  
161 a 3-T Magnetom Skyra Siemens scanner and a 32-channel head coil at the ELSC Neuroimaging  
162 Unit (ENU). The cortical surface was reconstructed from the high-resolution anatomical images  
163 using standard procedures implemented by the BrainVoyager QX software package (version  
164 2.84; Brain Innovation, The Netherlands). The functional T2\*-weighted MRI protocols were based  
165 on a multislice gradient echo-planar imaging and obtained under the following parameters: TR =  
166 1 s, TE = 30 ms, flip angle =  $90^\circ$ , imaging matrix =  $64 \times 64$ , field-of-view = 192 mm; 42 slices with  
167 3 mm slice thickness and no gap were oriented in AC-PC plane, covering the whole brain, with  
168 functional voxels of  $3 \times 3 \times 3$  mm and multiband parallel imaging with an acceleration factor of 3  
169 (Moeller et al., 2010).

170 Preprocessing of functional scans in BrainVoyager included 3D motion correction, slice scan  
171 time correction, and removal of low frequencies up to 3 cycles per scan (linear trend removal and  
172 high-pass filtering). The anatomical and functional images were transformed to the Talairach  
173 coordinate system using trilinear interpolation. Each voxel's time course was z-score normalized  
174 and smoothed using a 3D Gaussian filter (FWHM of 4 mm). A standard (2 gamma) hemodynamic  
175 response function (Friston et al., 1998) was convolved with the trial timings of each TOA block to  
176 build four predictors for the subsequent GLM analysis. For all task-responsive voxels ( $p < 0.001$ ,

177 FDR corrected; Benjamini & Yekutieli, 2001), each TOA condition was modeled separately to  
178 account for its contribution to the measured BOLD signal in each voxel. Specifically, a single  $\beta$   
179 value was obtained for each TOA condition. An exponential decay model (see Results) was fitted  
180 to these  $\beta$  values, and its parameters were estimated for each voxel in each subject using a least-  
181 square method. For ROI analysis, the MNI coordinates of auditory cortex subdivision were  
182 obtained from Morosan et al. (2001) and translated into Talairach coordinates using Yale  
183 BiImage Suite Package ([sprout022.sprout.yale.edu/mni2tal/mni2tal.html](http://sprout022.sprout.yale.edu/mni2tal/mni2tal.html); Lacadie, Fulbright,  
184 Rajeevan, Constable, & Papademetris, 2008). The BOLD signal was averaged for each ROI and  
185 then the  $\beta$  values of the four TOA blocks were fitted to the exponential decay.

186 Non-parametric tests (Mann-Whitney's U-test) were used for group comparison, since we did  
187 not assume a normal distribution (Jaffe-Dax et al., 2017). Whole-brain significance results were  
188 corrected for multiple comparison false positive biases by a Monte-Carlo cluster correction  
189 (Forman et al., 1995; Goebel, Esposito, & Formisano, 2006).

## 190 **Acknowledgments**

191 We thank Udi Zohary, Yuval Porat, Luba Daikhin, Tal Golan and Zvi Roth for their valuable  
192 feedback on this manuscript. This study was supported by the Israel Science Foundation (ISF  
193 grant no. 616/11 and Canada-Israel grant no. 2425/15), the Gatsby Charitable Foundation, The  
194 German-Israeli Foundation for Scientific Research and Development (grant no. I-1303-  
195 105.4/2015), Canadian Institutes of Health Research (CIHR), The International Development  
196 Research Center (IDRC) and the Azrieli Foundation.

## 197 **References**

- 198 Ahissar, M., Lubin, Y., Putter-Katz, H., & Banai, K. (2006). Dyslexia and the failure to form a  
199 perceptual anchor. *Nature Neuroscience*, 9(12), 1558–64. <https://doi.org/10.1038/nn1800>
- 200 Ahissar, M., Protopapas, A., Reid, M., & Merzenich, M. M. (2000). Auditory processing parallels  
201 reading abilities in adults. *Proceedings of the National Academy of Sciences of the United*  
202 *States of America*, 97(12), 6832–6837. Retrieved from  
203 <http://www.pnas.org/content/97/12/6832.abstract>
- 204 Benjamini, Y., & Yekutieli, D. (2001). The control of the false discovery rate in multiple testing  
205 under dependency. *Annals of Statistics*, 29(4), 1165–1188.  
206 <https://doi.org/10.1214/aos/1013699998>
- 207 Boets, B., Op de Beeck, H. P., Vandermosten, M., Scott, S. K., Gillebert, C. R., Mantini, D., ...  
208 Ghesquière, P. (2013). Intact but less accessible phonetic representations in adults with  
209 dyslexia. *Science (New York, N.Y.)*, 342(6163), 1251–4.  
210 <https://doi.org/10.1126/science.1244333>
- 211 Bushara, K. O., Hanakawa, T., Immisch, I., Toma, K., Kansaku, K., & Hallett, M. (2003). Neural  
212 correlates of cross-modal binding. *Nature Neuroscience*, 6(2), 190–195.  
213 <https://doi.org/10.1038/nn993>
- 214 Clark, K. A., Helland, T., Specht, K., Narr, K. L., Manis, F. R., Toga, a W., & Hugdahl, K. (2014).  
215 Neuroanatomical precursors of dyslexia identified from pre-reading through to age 11. *Brain*,  
216 137, 3136–3141. <https://doi.org/10.1093/brain/awu229>
- 217 Craig, A. D., Chen, K., Bandy, D., & Reiman, E. M. (2000). Thermosensory activation of insular  
218 cortex. *Nature Neuroscience*, 3(2), 184–190. <https://doi.org/10.1038/72131>

- 219 Daikhin, L., & Ahissar, M. (2015). Fast learning of Simple Perceptual Discrimination Reduces  
220 Brain Activation in Working Memory and in High-level Auditory Regions. *Journal of Cognitive*  
221 *Neuroscience*, 27(7), 1308–1321.
- 222 Deen, B., Koldewyn, K., Kanwisher, N., & Saxe, R. (2015). Functional organization of social  
223 perception and cognition in the superior temporal sulcus. *Cerebral Cortex*, 25(11), 4596–  
224 4609. <https://doi.org/10.1093/cercor/bhv111>
- 225 Dick, F., Taylor Tierney, A., Lutti, A., Josephs, O., Sereno, M. I., & Weiskopf, N. (2012). In Vivo  
226 Functional and Myeloarchitectonic Mapping of Human Primary Auditory Areas. *Journal of*  
227 *Neuroscience*, 32(46), 16095–16105. <https://doi.org/10.1523/JNEUROSCI.1712-12.2012>
- 228 Fedorenko, E., Behr, M. K., & Kanwisher, N. (2011). Functional specificity for high-level linguistic  
229 processing in the human brain. *Proceedings of the National Academy of Sciences of the*  
230 *United States of America*, (i). <https://doi.org/10.1073/pnas.1112937108>
- 231 Fedorenko, E., Hsieh, P.-J., Nieto-Castañón, A., Whitfield-Gabrieli, S., & Kanwisher, N. (2010).  
232 New method for fMRI investigations of language: defining ROIs functionally in individual  
233 subjects. *Journal of Neurophysiology*, 104(2), 1177–94.  
234 <https://doi.org/10.1152/jn.00032.2010>
- 235 Forman, S. D., Cohen, J. D., Fitzgerald, M., Eddy, W. F., Mintun, M. A., & Noll, D. C. (1995).  
236 Improved Assessment of Significant Activation in Functional Magnetic Resonance Imaging  
237 (fMRI): Use of a Cluster-Size Threshold. *Magnetic Resonance in Medicine*, 33(5), 636–647.  
238 <https://doi.org/10.1002/mrm.1910330508>
- 239 Friston, K. J., Fletcher, P., Josephs, O., Holmes, a, Rugg, M. D., & Turner, R. (1998). Event-  
240 related fMRI: characterizing differential responses. *NeuroImage*, 7(1), 30–40.  
241 <https://doi.org/10.1006/nimg.1997.0306>
- 242 Giraud, A. L., & Ramus, F. (2013). Neurogenetics and auditory processing in developmental  
243 dyslexia. *Current Opinion in Neurobiology*, 23(1), 37–42.  
244 <https://doi.org/10.1016/j.conb.2012.09.003>
- 245 Goebel, R., Esposito, F., & Formisano, E. (2006). Analysis of Functional Image Analysis Contest  
246 (FIAC) data with BrainVoyager QX: From single-subject to cortically aligned group General  
247 Linear Model analysis and self-organizing group Independent Component Analysis. *Human*  
248 *Brain Mapping*, 27(5), 392–401. <https://doi.org/10.1002/hbm.20249>
- 249 Jaffe-Dax, S., Frenkel, O., & Ahissar, M. (2017). Dyslexics' faster decay of implicit memory for  
250 sounds and words is manifested in their shorter neural adaptation. *eLife*, 6, 1–19.  
251 <https://doi.org/10.7554/eLife.20557>
- 252 Jaffe-Dax, S., Lieder, I., Biron, T., & Ahissar, M. (2016). Dyslexics' usage of visual prior is  
253 impaired. *Journal of Vision*, 16, 1–9. <https://doi.org/10.1167/16.9.10>
- 254 Jaffe-Dax, S., Raviv, O., Jacoby, N., Loewenstein, Y., & Ahissar, M. (2015). A Computational  
255 Model of Implicit Memory Captures Dyslexics' Perceptual Deficits. *Journal of Neuroscience*,  
256 35(35), 12116–12126. <https://doi.org/10.1523/JNEUROSCI.1302-15.2015>
- 257 Lacadie, C. M., Fulbright, R. K., Rajeevan, N., Constable, R. T., & Papademetris, X. (2008). More  
258 accurate Talairach coordinates for neuroimaging using non-linear registration. *NeuroImage*,  
259 42(2), 717–725. <https://doi.org/10.1016/j.neuroimage.2008.04.240>
- 260 Lindgren, S. D., De Renzi, E., & Richman, L. C. (1985). Cross-National Comparisons of  
261 Developmental Dyslexia in Italy and the United States. *Child Development*, 56(6), 1404–  
262 1417.



- 263 Lu, Z.-L., Williamson, J., & Kaufman, L. (1992). Behavioral Lifetime of Human Auditory Sensory  
264 Memory Predicted by Physiological Measures. *Science*, 258(5088), 1668–1670.
- 265 Mayhew, S. D., Dirckx, S. G., Niazy, R. K., Iannetti, G. D., & Wise, R. G. (2010). EEG signatures  
266 of auditory activity correlate with simultaneously recorded fMRI responses in humans.  
267 *NeuroImage*, 49(1), 849–64. <https://doi.org/10.1016/j.neuroimage.2009.06.080>
- 268 McAnally, K. I., & Stein, J. F. (1996). Auditory Temporal Coding in Dyslexia. *Proceedings of the*  
269 *Royal Society B: Biological Sciences*, 263(1373), 961–5.  
270 <https://doi.org/10.1098/rspb.1996.0142>
- 271 Moeller, S., Yacoub, E., Olfman, C. A., Auerbach, E., Strupp, J., Harel, N., & Uğurbil, K. (2010).  
272 Multiband multislice GE-EPI at 7 tesla, with 16-fold acceleration using partial parallel imaging  
273 with application to high spatial and temporal whole-brain fMRI. *Magnetic Resonance in*  
274 *Medicine*, 63(5), 1144–1153. <https://doi.org/10.1002/mrm.22361>
- 275 Morosan, P., Rademacher, J., Schleicher, A., Amunts, K., Schormann, T., & Zilles, K. (2001).  
276 Human primary auditory cortex: cytoarchitectonic subdivisions and mapping into a spatial  
277 reference system. *Neuroimage*, 13(4), 684–701. <https://doi.org/10.1006/nimg.2000.0715>
- 278 Oganian, Y., & Ahissar, M. (2012). Poor anchoring limits dyslexics' perceptual, memory, and  
279 reading skills. *Neuropsychologia*, 50(8), 1895–905.  
280 <https://doi.org/10.1016/j.neuropsychologia.2012.04.014>
- 281 Perrachione, T. K., Del Tufo, S. N., Winter, R., Murtagh, J., Cyr, A., Chang, P., ... Gabrieli, J. D.  
282 E. (2016). Dysfunction of Rapid Neural Adaptation in Dyslexia. *Neuron*, 92(6), 1383–1397.  
283 <https://doi.org/10.1016/j.neuron.2016.11.020>
- 284 Raviv, O., Ahissar, M., & Loewenstein, Y. (2012). How recent history affects perception: the  
285 normative approach and its heuristic approximation. *PLoS Computational Biology*, 8(10),  
286 e1002731. <https://doi.org/10.1371/journal.pcbi.1002731>
- 287 Raviv, O., Lieder, I., Loewenstein, Y., & Ahissar, M. (2014). Contradictory Behavioral Biases  
288 Result from the Influence of Past Stimuli on Perception. *PLoS Computational Biology*,  
289 10(12), e1003948. <https://doi.org/10.1371/journal.pcbi.1003948>
- 290 Sperling, A. J., Lu, Z.-L., Manis, F. R., & Seidenberg, M. S. (2005). Deficits in perceptual noise  
291 exclusion in developmental dyslexia. *Nature Neuroscience*, 8(7), 862–3.  
292 <https://doi.org/10.1038/nn1474>
- 293 WHO. (2010). International Classification of Diseases (ICD-10). Retrieved from  
294 <http://apps.who.int/classifications/icd10/browse/2016/en#/F81>
- 295 Zatorre, R. J., Belin, P., & Penhune, V. B. (2002). Structure and function of auditory cortex: music  
296 and speech. *Trends in Cognitive Sciences*, 6(1), 37–46.
- 297
